# Supplementary material for: Ecophysiological consequences of alcoholism on human gut microbiota: implications for ethanol-related pathogenesis of colon cancer
Source: PubMed Central journal article supplement (PMC4904738; doi:10.1038/srep27923), 2016-06-13
Supplement: srep27923-s1.pdf [file srep27923-s1.pdf]

# SUPPLEMENTARY INFORMATION

TO

**Ecophysiological consequences of alcoholism on human gut microbiota: implications for ethanol-related pathogenesis of colon cancer**

BY

**Atsuki Tsuruya, Akika Kuwahara, Yuta Saito, Haruhiko Yamaguchi, Takahisa Tsubo, Shogo Suga, Makoto Inai, Yuichi Aoki, Seiji Takahashi, Eri Tsutsumi, Yoshihide Suwa, Hidetoshi Morita, Kenji Kinoshita, Yukari Totsuka, Wataru Suda, Kenshiro Oshima, Masahira Hattori, Takeshi Mizukami, Akira Yokoyama, Takefumi Shimoyama, Toru Nakayama**

---

## Table of Contents

| Supplementary materials       | page |
|-------------------------------|------|
| Supplementary Table S1 .....  | 2    |
| Supplementary Figure S1 ..... | 4    |
| Supplementary Figure S2 ..... | 5    |
| Supplementary Figure S3 ..... | 6    |
| Supplementary Figure S4 ..... | 7    |
| Supplementary Figure S5 ..... | 8    |
| Supplementary Figure S6 ..... | 11   |
| Supplementary Figure S7 ..... | 12   |
| Supplementary Figure S8 ..... | 13   |
| Supplementary Figure S9 ..... | 14   |

**Supplementary Table S1. Characteristics of the alcoholic and non-alcoholic subjects included in the GM analyses**

| Sample ID                    | Age | Sex    | Drinking habit score <sup>*1</sup> | Smoking habit score <sup>*1</sup> | Group <sup>*2</sup> | <i>ADH1B</i> | <i>ALDH2</i> |
|------------------------------|-----|--------|------------------------------------|-----------------------------------|---------------------|--------------|--------------|
| Alcoholics                   |     |        |                                    |                                   |                     |              |              |
| AL02                         | 63  | male   | 4                                  | 1                                 | 3                   | *1/*2        | *1/*1        |
| AL03                         | 45  | male   | 4                                  | 4                                 | 4                   | *1/*1        | *1/*1        |
| AL04                         | 56  | male   | 4                                  | 1                                 | 3                   | *2/*2        | *1/*1        |
| AL05                         | 60  | male   | 4                                  | 4                                 | 4                   | *2/*2        | *1/*1        |
| AL06                         | 34  | male   | 4                                  | 1                                 | 3                   | *1/*2        | *1/*1        |
| AL07                         | 41  | male   | 4                                  | 4                                 | 4                   | *1/*2        | *1/*1        |
| AL08                         | 52  | male   | 4                                  | 4                                 | 4                   | *2/*2        | *1/*1        |
| AL09                         | 66  | male   | 4                                  | 1                                 | 3                   | *1/*2        | *1/*1        |
| AL10                         | 60  | male   | 4                                  | 1                                 | 3                   | *2/*2        | *1/*1        |
| AL11                         | 49  | male   | 4                                  | 4                                 | 4                   |              |              |
| AL12                         | 52  | male   | 4                                  | 3                                 | 4                   |              |              |
| AL13                         | 71  | male   | 4                                  | 4                                 | 4                   |              |              |
| AL14                         | 68  | male   | 4                                  | 4                                 | 4                   |              |              |
| AL15                         | 50  | male   | 4                                  | 4                                 | 4                   |              |              |
| AL17                         | 64  | male   | 4                                  | 4                                 | 4                   |              |              |
| AL18                         | 40  | male   | 4                                  | 1                                 | 3                   |              |              |
| Non-alcoholics <sup>*3</sup> |     |        |                                    |                                   |                     |              |              |
| NA01                         | 21  | female | 2                                  | 1                                 | 1                   |              |              |
| NA02                         | 21  | female | 1                                  | 1                                 | 1                   |              |              |
| NA03                         | 22  | female | 1                                  | 1                                 | 1                   |              |              |
| NA04                         | 20  | male   |                                    |                                   |                     |              |              |
| NA05                         | 20  | male   | 3                                  | 1                                 | 3                   |              |              |
| NA06                         | 21  | female | 1                                  | 1                                 | 1                   |              |              |
| NA07                         | 21  | female | 1                                  | 1                                 | 1                   |              |              |
| NA08                         | 22  | female | 1                                  | 1                                 | 1                   |              |              |
| NA09                         | 21  | female | 3                                  | 3                                 | 4                   |              |              |
| NA10                         | 19  | male   |                                    |                                   |                     |              |              |
| NA11                         | 20  | female | 1                                  | 1                                 | 1                   |              |              |
| NA12                         | 21  | female | 1                                  | 1                                 | 1                   |              |              |
| NA13                         | 33  | male   | 1                                  | 1                                 | 1                   |              |              |
| NA14                         | 19  | female | 1                                  | 1                                 | 1                   |              |              |
| NA15                         | 19  | female | 3                                  | 3                                 | 4                   |              |              |
| NA16                         | 21  | female | 3                                  | 4                                 | 4                   |              |              |
| NA17                         | 19  | male   |                                    |                                   |                     |              |              |
| NA18                         | 50  | male   | 2                                  | 1                                 | 1                   |              |              |
| NA19                         | 50  | male   | 2                                  | 3                                 | 2                   |              |              |
| NA20                         | 28  | female | 3                                  | 1                                 | 3                   |              |              |
| NA21                         | 39  | female | 1                                  | 1                                 | 1                   |              |              |

|      |    |        |   |   |   |       |       |
|------|----|--------|---|---|---|-------|-------|
| NA22 | 33 | female | 1 | 1 | 1 |       |       |
| NA23 | 45 | male   | 2 | 1 | 1 |       |       |
| NA24 | 35 | male   | 2 | 3 | 2 |       |       |
| NA25 | 50 | male   | 3 | 3 | 4 |       |       |
| NA26 | 31 | male   |   | 3 |   |       |       |
| NA27 | 29 | male   | 2 | 1 | 1 |       |       |
| NA28 | 28 | male   |   | 3 |   |       |       |
| NA29 | 28 | male   |   | 3 |   |       |       |
| NA30 | 23 | female |   | 1 |   |       |       |
| NA31 | 22 | female | 3 | 3 | 4 |       |       |
| NA32 | 23 | male   | 3 | 1 | 3 |       |       |
| NA33 | 22 | male   | 2 | 3 | 2 |       |       |
| NA34 | 22 | female | 2 | 1 | 1 |       |       |
| NA35 | 49 | male   | 3 | 1 | 3 |       |       |
| NA36 | 41 | male   |   | 3 |   |       |       |
| NA37 | 37 | male   | 2 | 3 | 2 |       |       |
| NA38 | 34 | female | 2 | 1 | 1 |       |       |
| NA39 | 26 | male   | 2 | 1 | 1 |       |       |
| NA40 | 36 | female | 1 | 1 | 1 |       |       |
| NA41 | 26 | male   | 1 | 1 | 1 | *2/*2 | *1/*1 |
| NA42 | 25 | male   | 2 | 1 | 1 | *1/*2 | *1/*1 |
| NA43 | 23 | male   | 1 | 1 | 1 | *1/*2 | *1/*2 |
| NA44 | 30 | male   | 1 | 1 | 1 | *2/*2 | *2/*2 |
| NA45 | 24 | male   | 2 | 1 | 1 | *2/*2 | *1/*2 |
| NA46 | 59 | male   | 1 | 1 | 1 | *2/*2 | *1/*2 |
| NA47 | 23 | male   | 2 | 1 | 1 | *1/*2 | *1/*1 |
| NA48 | 56 | male   | 4 | 1 | 3 | *1/*2 | *1/*1 |

\*<sup>1</sup> Drinking-habit and smoking-habit scores are defined as described in the **Methods** section.

\*<sup>2</sup> Groups are classified according to drinking and smoking habits. Group 1, neither habitual drinker nor habitual smoker; Group 2, habitual smoker but not habitual drinker; Group 3, habitual drinker but not habitual smoker; and, Group 4, habitual drinker and habitual smoker (see the **Methods** section for the quantitative details of the Group definitions)

\*<sup>3</sup> The non-alcoholic volunteers without one or both of the drinking-habit and smoking-habit scores are those who did not respond to the questionnaire.

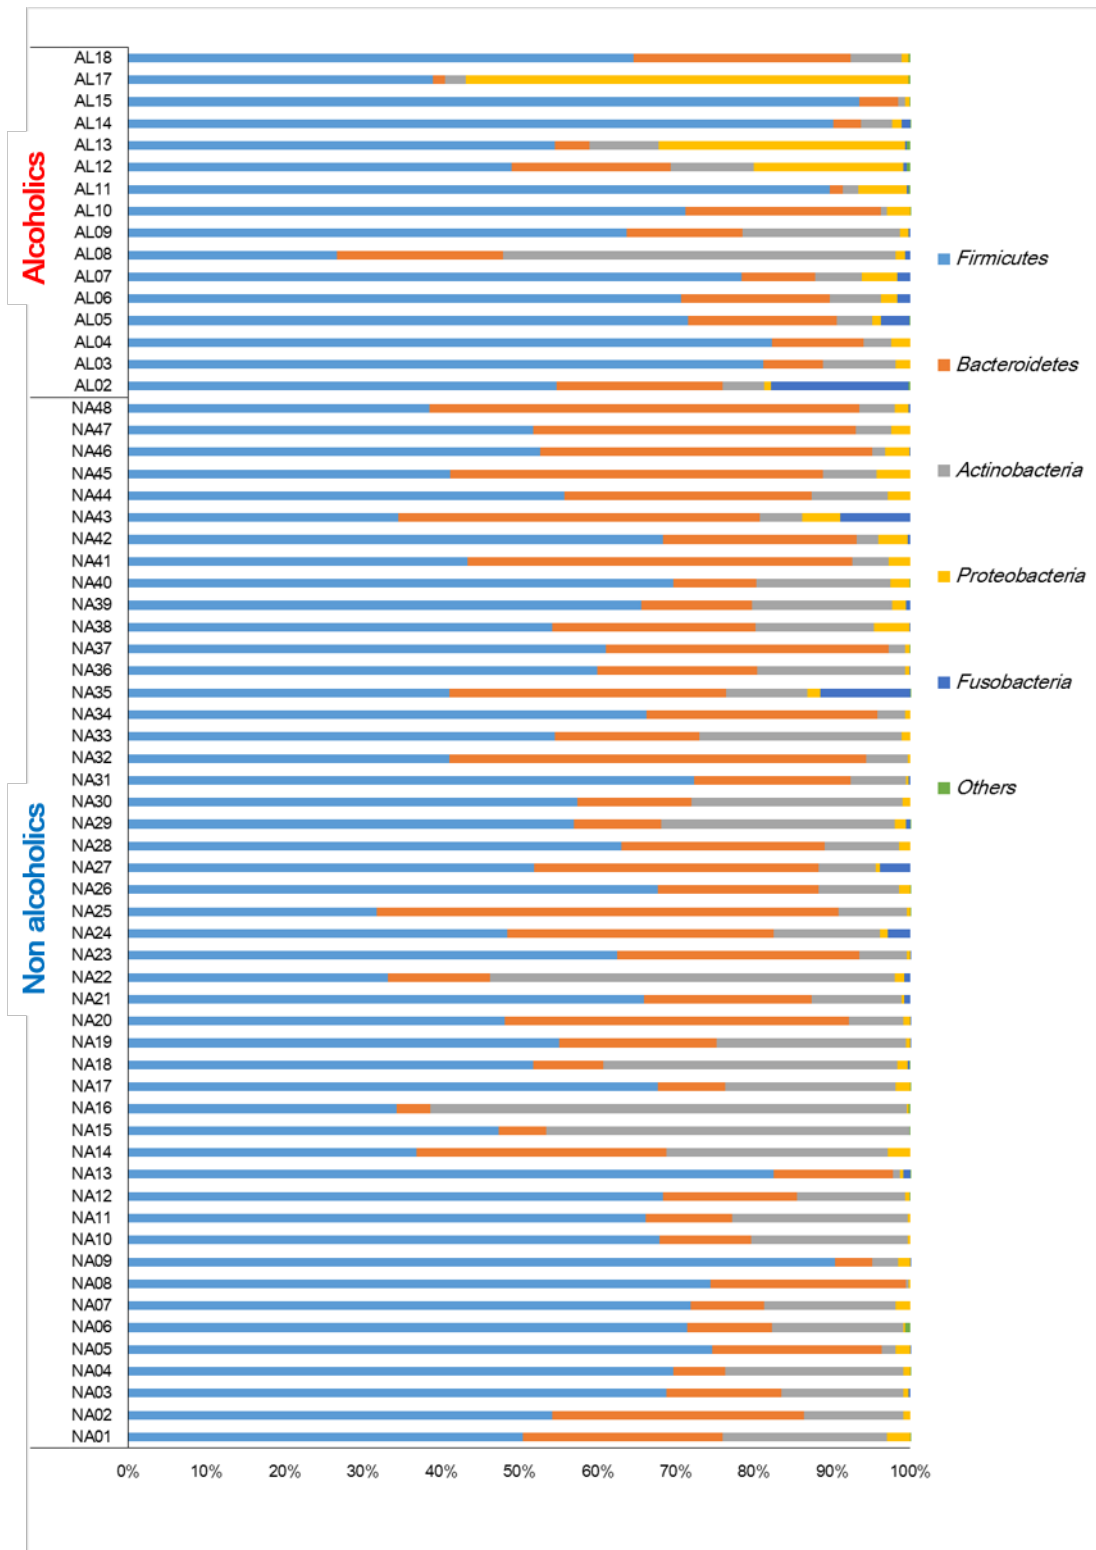

Supplementary Figure S1 | Relative abundances of bacterial phyla in the fecal bacterial communities of alcoholics (*upper*) and non-alcoholics (*lower*).

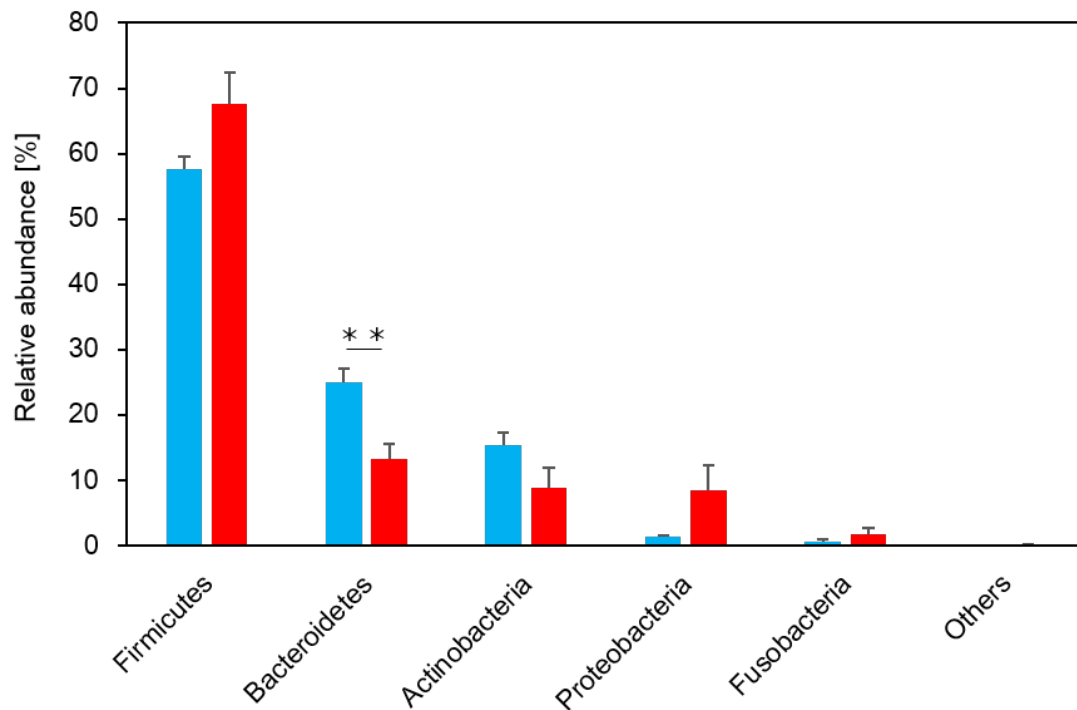

**Supplementary Figure S2 | Comparison of relative abundances of five prominent bacterial phyla in the fecal bacterial communities between non-alcoholics (blue bars) and alcoholics (red bars). \*\*  $P$ -value < 0.01 (Welch's test).**

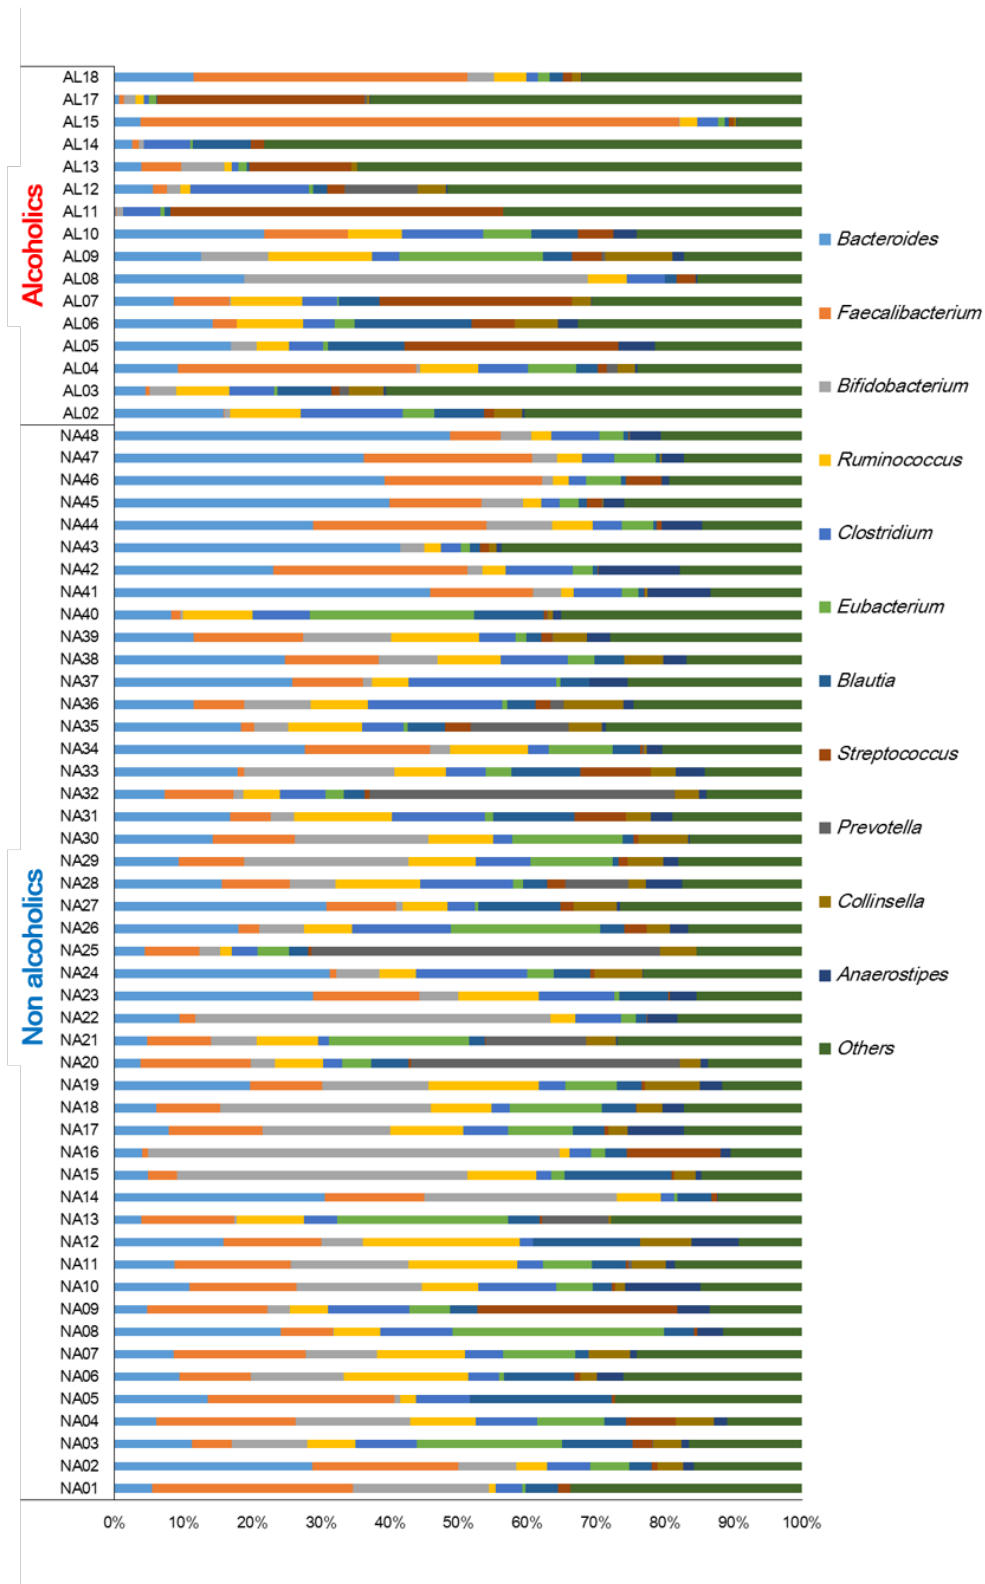

**Supplementary Figure S3 | Overall GM structures of the alcoholic (AL) and non-alcoholic (NA) subjects analyzed at the genus level.**

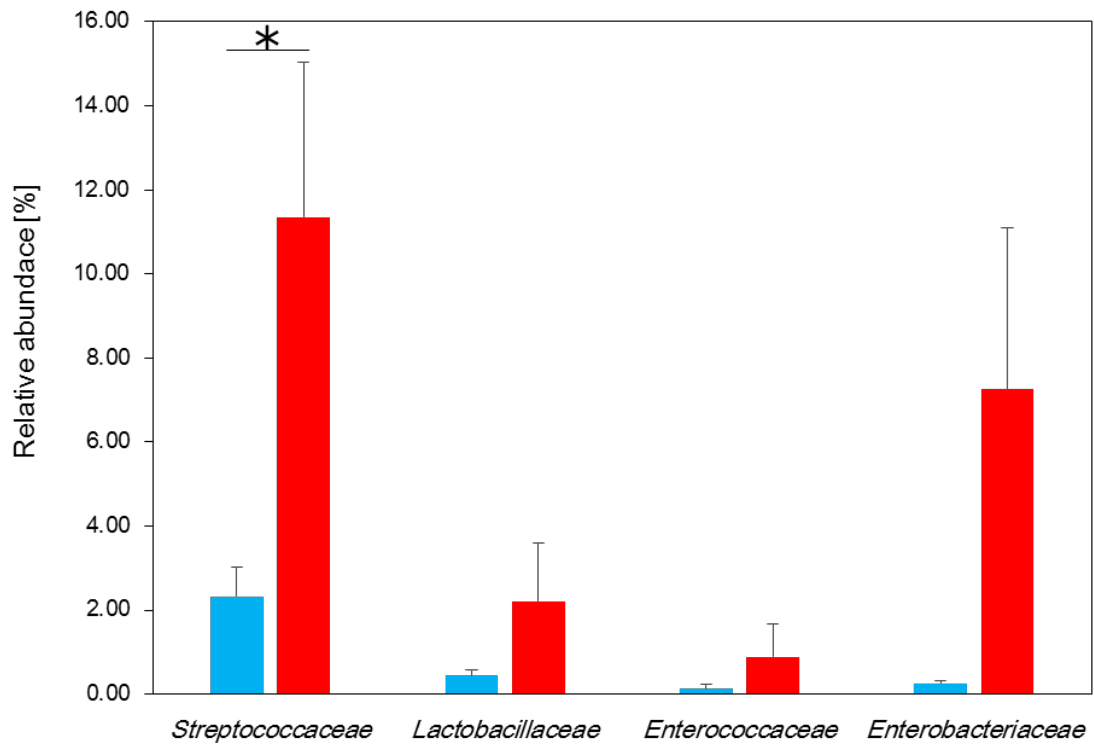

**Supplementary Figure S4 | Relative abundances of the families *Streptococcaceae*, *Lactobacillaceae*, *Enterococcaceae*, and *Enterobacteriaceae* in the fecal bacterial communities were compared between non-alcoholics (blue bars) and alcoholics (red bars). \*  $P$ -value < 0.05 (Welch's test).**

(A)

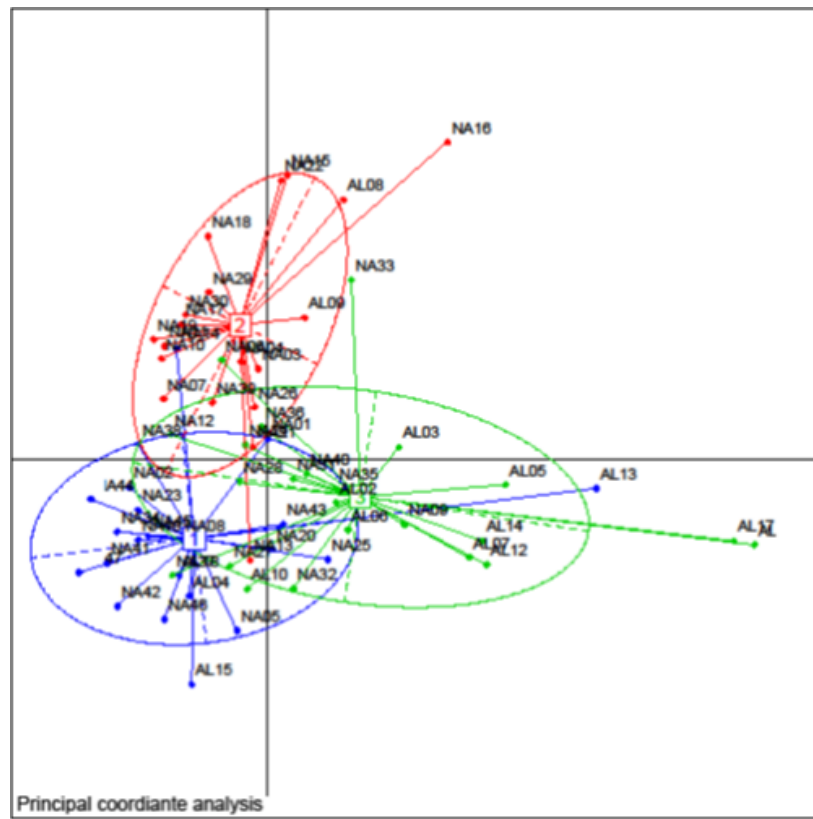

Supplementary Figure S5 (continued on the following page)



(B)

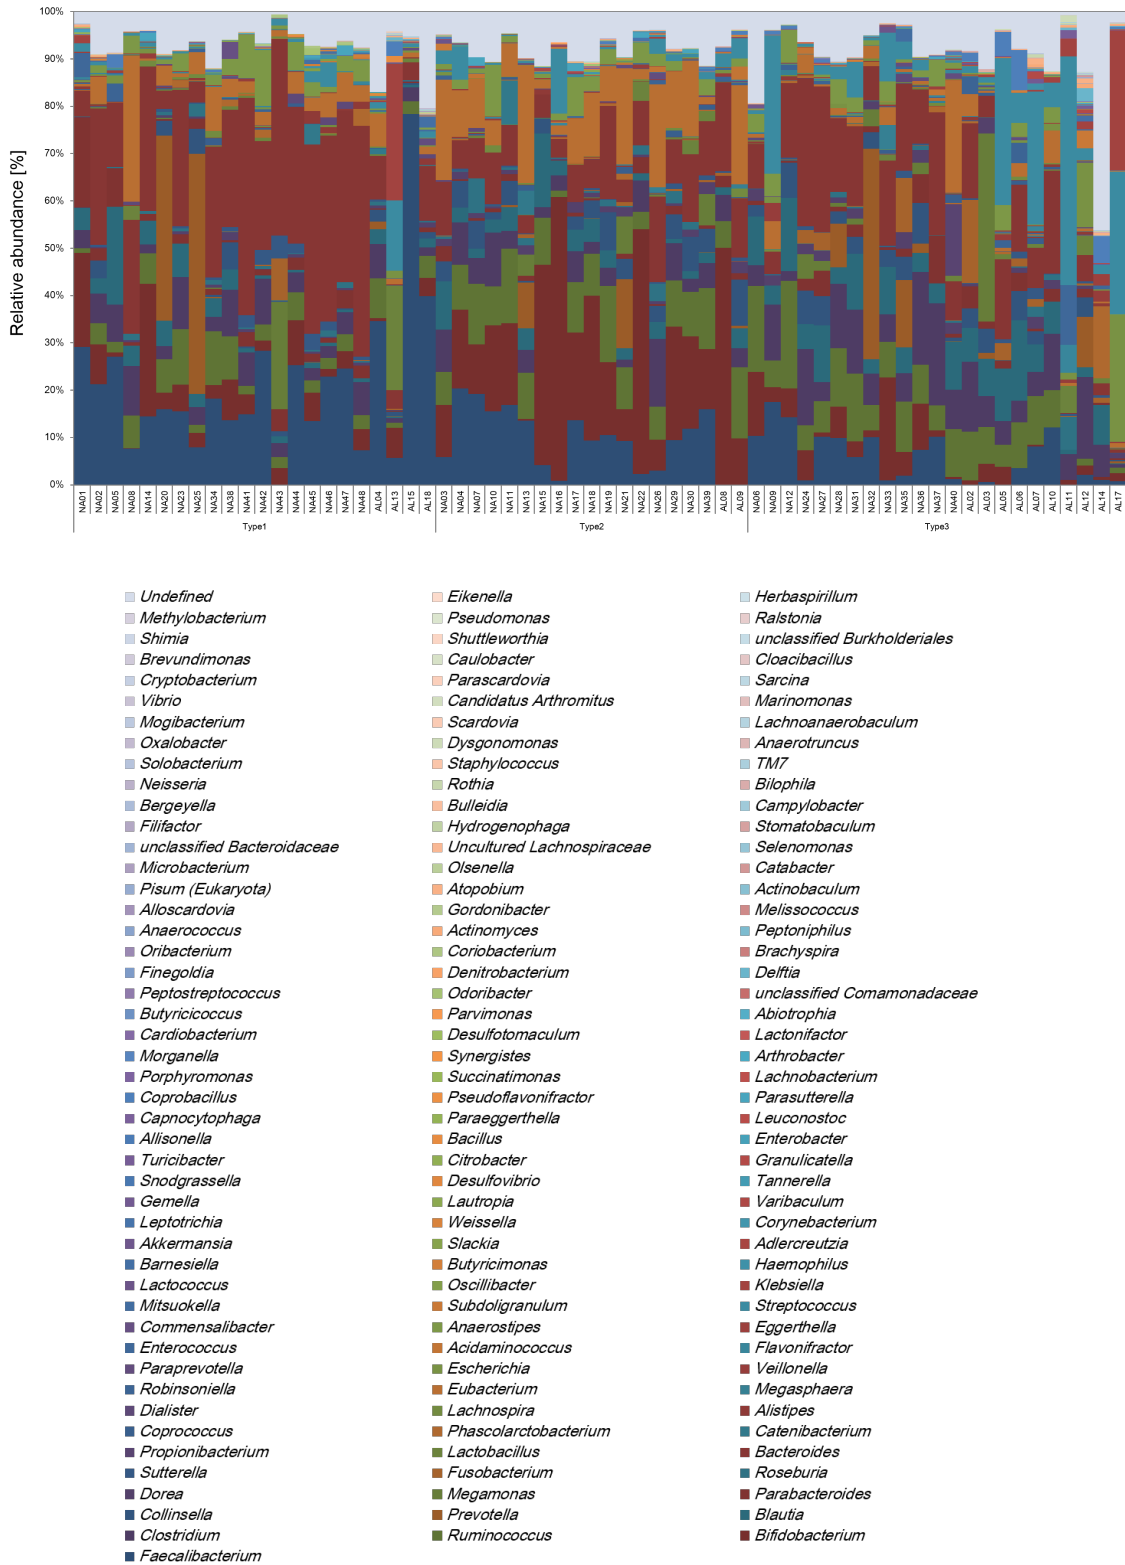

Supplementary Figure S5 (continued on the following page)

(Continued from the previous page)

**Supplementary Figure S5 | Enterotyping of GM structures. (A) Identification of three possible enterotypes (termed types 1, 2, and 3) as analyzed by using R. (B) Clustering of GM according to enterotypes.** Enterotyping of 64 GM datasets obtained in this study were performed on the basis of relative genus abundance. The analysis allowed us to identify three possible enterotypes [type 1 (*blue*, 22 subjects), type 2 (*red*, 19 subjects), and type 3 (*green*, 23 subjects); see (A)], wherein alcoholic GM structures were distributed unevenly (type 1, 4 subjects; type 2, 2 subjects; and type 3, 10 subjects; see (B)). For comparison, the numbers of non-alcoholic GM structures in types 1, 2, and 3 were almost comparable with each other (18, 17, and 13 subjects, respectively) (B). These results suggest that these three enterotypes could be, primarily, equally identified among non-alcoholics, and habitual drinking (or combined habitual drinking and smoking) might result in enrichment of type-3 GM structure in alcoholics. Consistently, distributions of the subjects with drinking habits (i.e., Group 3) or those with drinking and smoking habits (i.e., Group 4) were also uneven among these enterotypes (see Fig. 3).

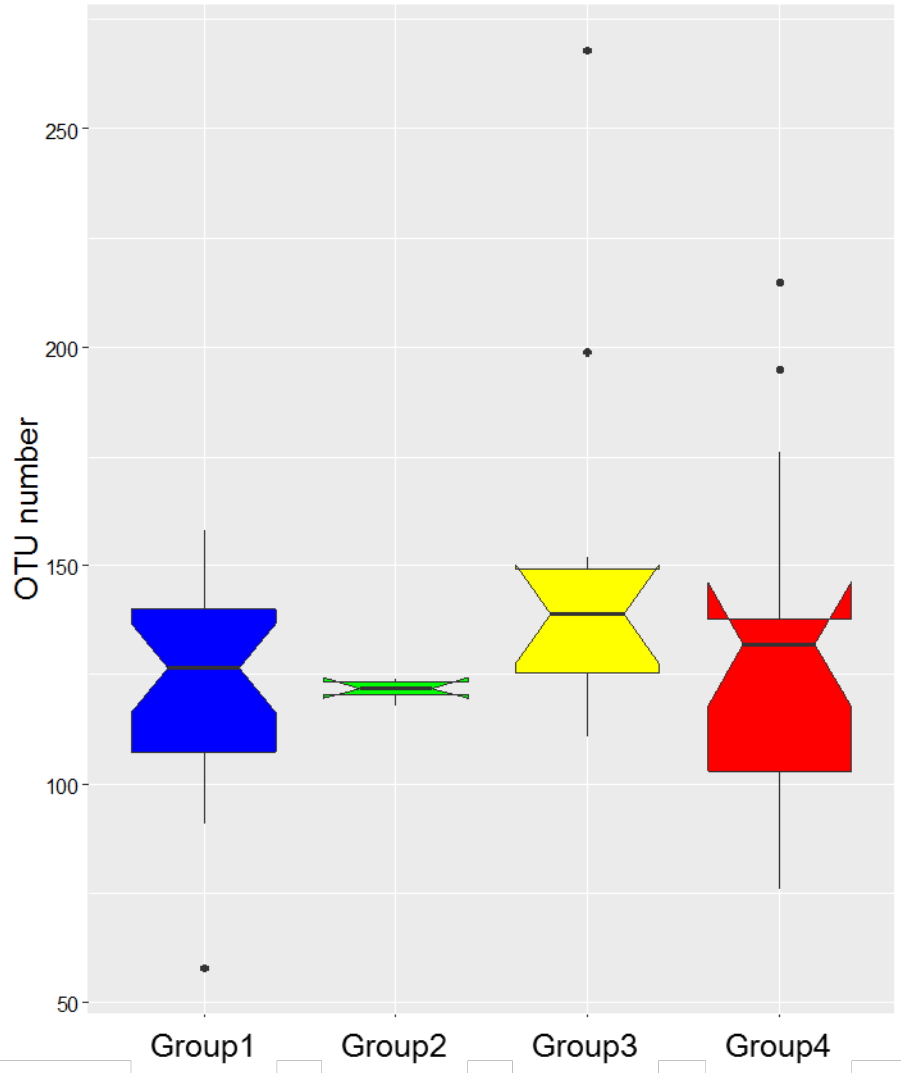

**Supplementary Figure S6 | Notched box plots of fecal OTU numbers ( $\alpha$ -diversity) of fecal bacterial communities of Groups 1 through 4 classified according to drinking and smoking habits.**

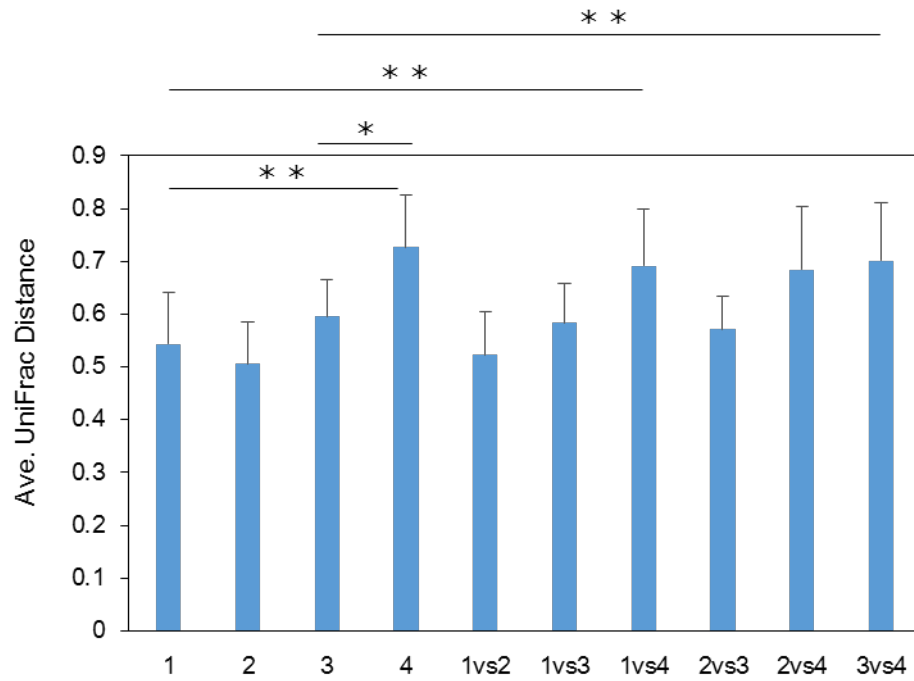

**Supplementary Figure S7 | Weighted average UniFrac distances of GM structures determined within a Group and between Groups.** Groups 1 through 4 were defined as described in the **Methods** section. *P*-values (by the Welch's *t*-test with 10,000 Monte Carlo simulations) adjusted based on the Bonferroni procedure were \**P* < 0.05 and \*\**P* < 0.01.

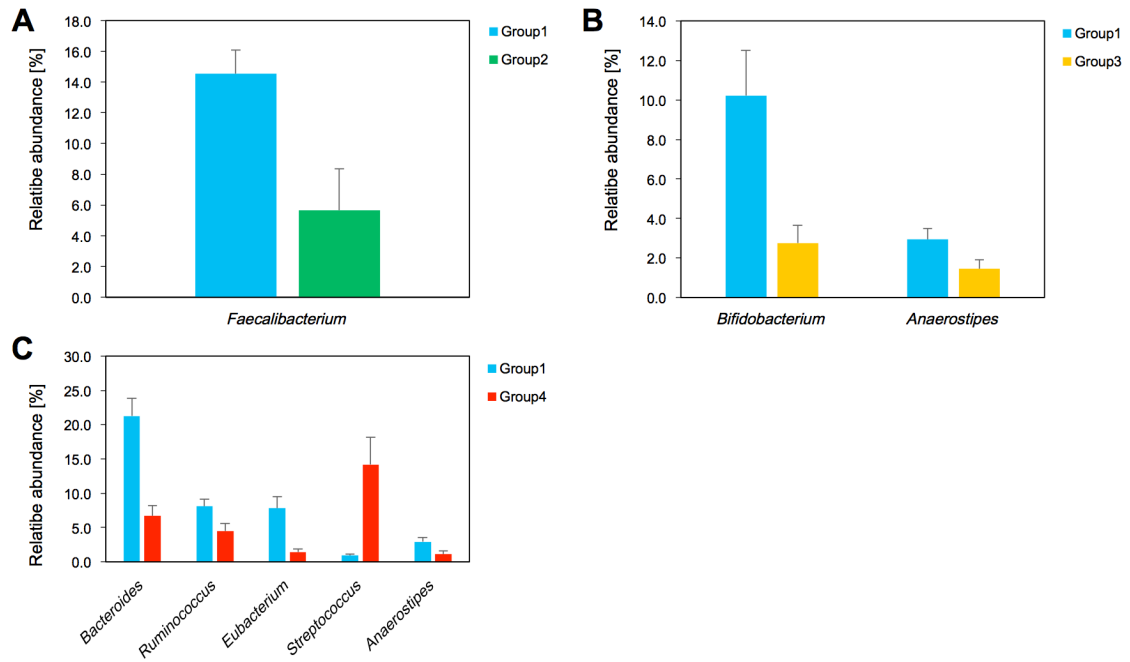

**Supplementary Figure S8 | Relative abundances of bacterial groups showing significant differences ( $P < 0.05$  according to Welch-test) as compared between fecal bacterial communities of (A) Groups 1 (blue bars) and 2 (green bars), (B) Groups 1 (blue bars) and 3 (yellow bars), and (C) Groups 1 (blue bars) and 4 (red bars).**

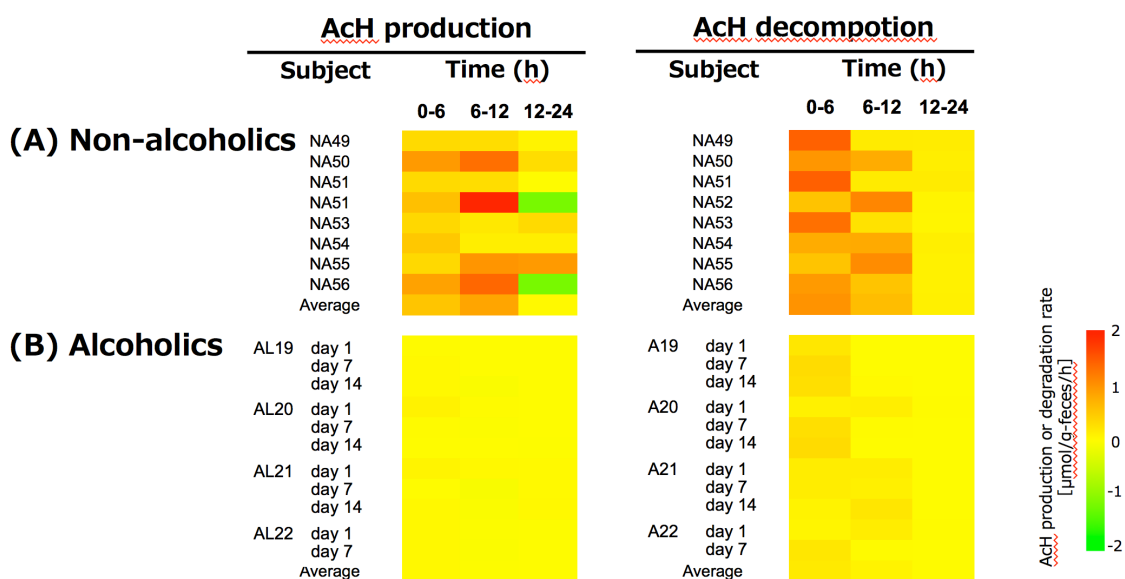

**Supplementary Figure S9 | Heat-map representation of the rates of fecal AcH production and decomposition as compared between the alcoholic and non-alcoholic subjects.** Rates of AcH production from 22 mM ethanol (*left panels*) and decomposition of AcH (initial concentration,  $170 \pm 35 \mu\text{M}$ ; *right panels*) during 0–6 h, 6–12 h, and 12–24 h of the reaction by fecal samples of eight non-alcoholic subjects (A) and four alcoholic patients (B) are shown. For experimental details, see the **Methods** section.
